# Supplementary material for: High-performance layered potassium vanadium oxide for K-ion batteries enabled by reduced long-range structural order
Source: Royal Society of Chemistry journal article supplement (doi:10.1039/d1ta01807h), 2021-01-01
Supplement: d1ta01807h1.pdf [file d1ta01807h1.pdf]

## Supporting Information

### High-Performance Layered Potassium Vanadium Oxide for K-Ion Batteries Enabled by Reduced Long-Range Structural Order

Xiaogang Niu,<sup>a</sup> Jiale Qu,<sup>b</sup> Youran Hong,<sup>c</sup> Leqing Deng,<sup>a</sup> Ruiting Wang,<sup>a</sup> Meiying Feng,<sup>a</sup> Jiangwei Wang,<sup>c</sup> Liang Zeng,<sup>d</sup> Qianfan Zhang,<sup>b\*</sup> Lin Guo<sup>\*a</sup> and Yujie Zhu<sup>\*ae</sup>

<sup>a</sup> School of Chemistry, Beihang University, Beijing 100191, P. R. China

<sup>b</sup> School of Materials Science and Engineering, Beihang University, Beijing 100191, P. R. China

<sup>c</sup> Center of Electron Microscopy and State Key Laboratory of Silicon Materials, School of Materials Science and Engineering, Zhejiang University, Hangzhou 310027, P. R. China

<sup>d</sup> Key Laboratory for Green Chemical Technology of Ministry of Education, School of Chemical Engineering and Technology, Tianjin University, Tianjin 300072, P.R. China

<sup>e</sup> Beijing Advanced Innovation Center for Biomedical Engineering, Beihang University, Beijing 100191, P. R. China

\* Corresponding Author: E-mail: [qianfan@buaa.edu.cn](mailto:qianfan@buaa.edu.cn) (Q. Z.), [guolin@buaa.edu.cn](mailto:guolin@buaa.edu.cn) (L. G.), [yujiezh@buaa.edu.cn](mailto:yujiezh@buaa.edu.cn) (Y. Z.)

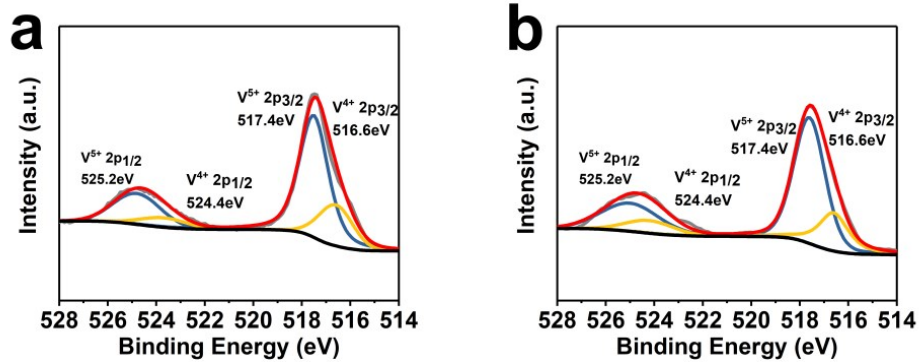

Fig. S1. The high-resolution V2p XPS spectra of a) KVO-H and b) KVO.

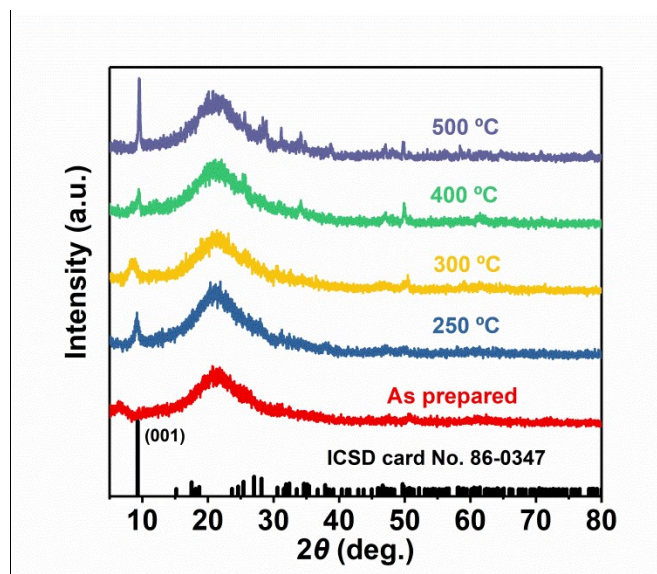

Fig. S2. XRD patterns of the as-prepared KVO-H and the samples annealed at 250, 300, 400, and 500 °C, respectively. The standard XRD pattern of monoclinic  $K_{0.486}V_2O_5$  (JCPDF No. 86-0347) is also presented.

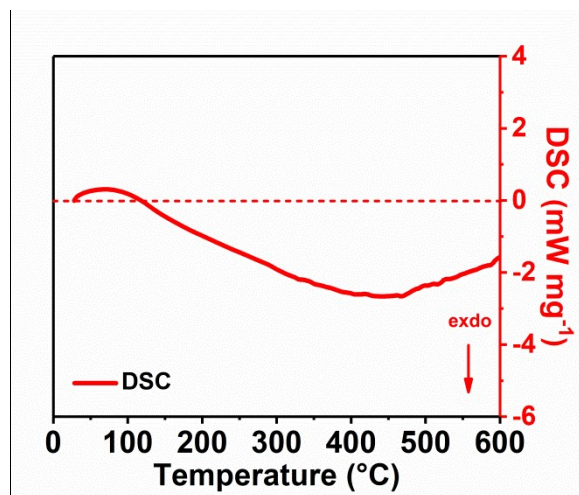

Fig. S3. The DSC profile of KVO-H.

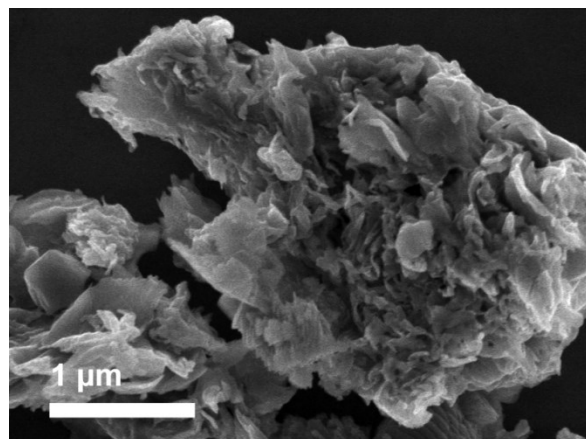

Fig. S4. SEM image of KVO-H.

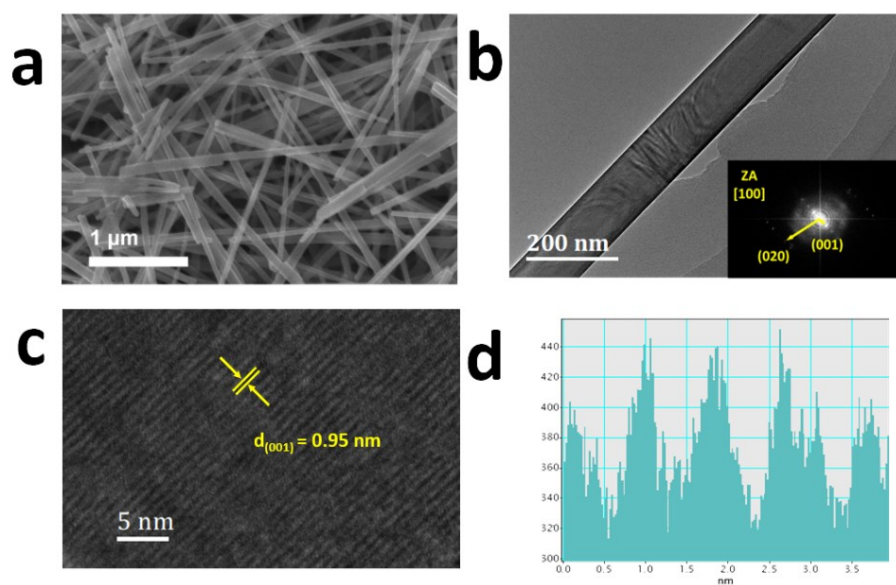

Fig. S5. a) SEM, b) TEM, and c) HRTEM images of KVO. d) Lattice spacing of the (001) plane for KVO measured from the HRTEM image shown in (c).

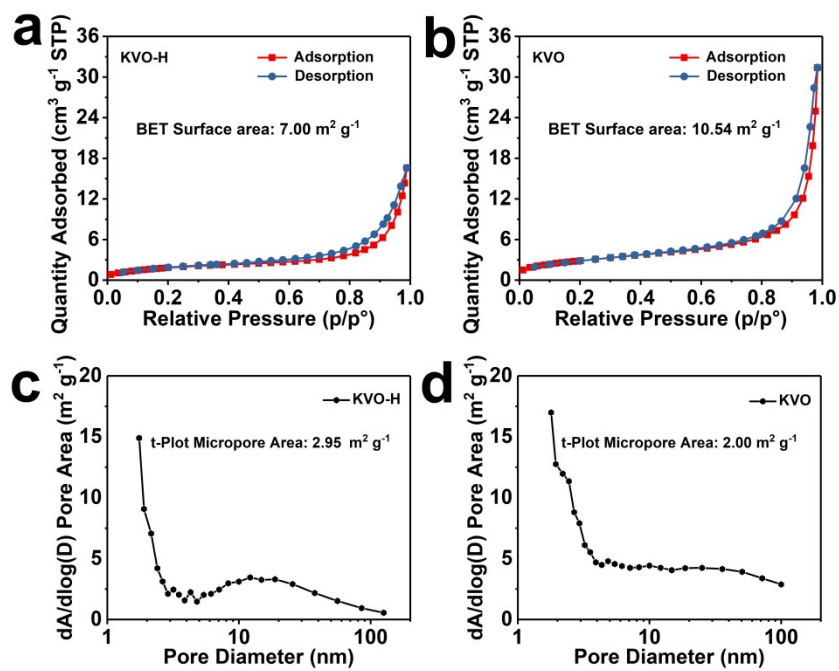

Fig. S6. N<sub>2</sub> adsorption–desorption isotherms and the Brunauer–Emmett–Teller (BET) surface areas of a) KVO-H and b) KVO. Barrett–Joyner–Halenda (BJH) pore areas of (c) KVO-H and (d) KVO.

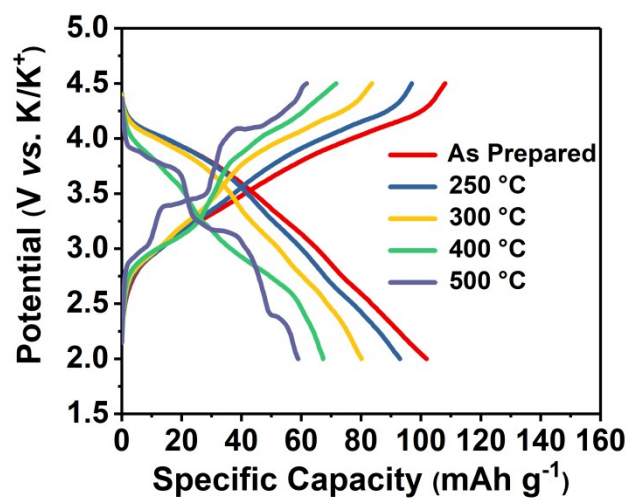

Fig. S7. Charge–discharge curves of KVO-H and the samples annealed at 250, 300, 400, and 500 °C, respectively. The specific current 20 mA g<sup>-1</sup> was used for all the tests.



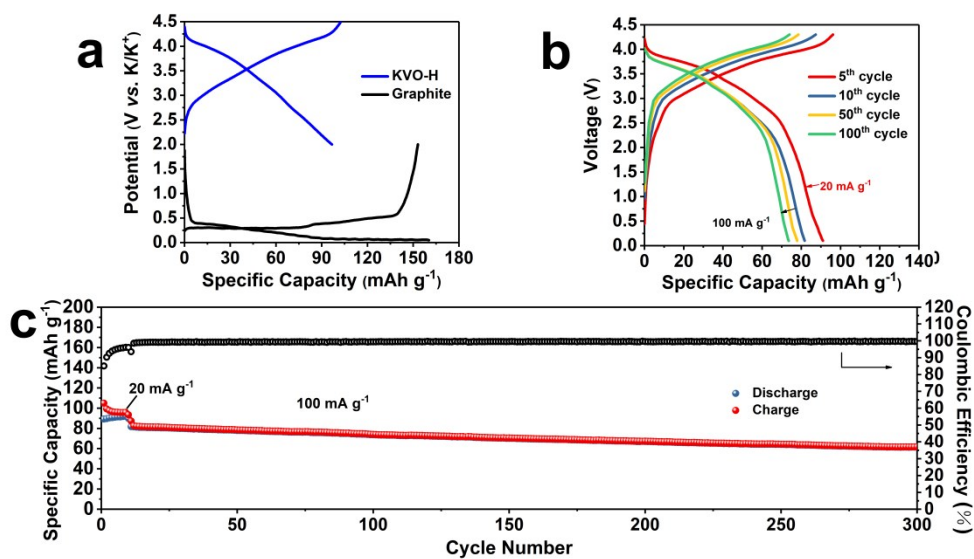

Fig. S8. Electrochemical performance of the full cell. a) Charge–discharge curves of KVO-H and commercial graphite at 20 mA g<sup>-1</sup>. b) Charge–discharge curves of the full cell at 20 and 100 mA g<sup>-1</sup>. c) Cycling performance of the full cell at 100 mA g<sup>-1</sup> with the initial 11 cycles tested at 20 mA g<sup>-1</sup>.

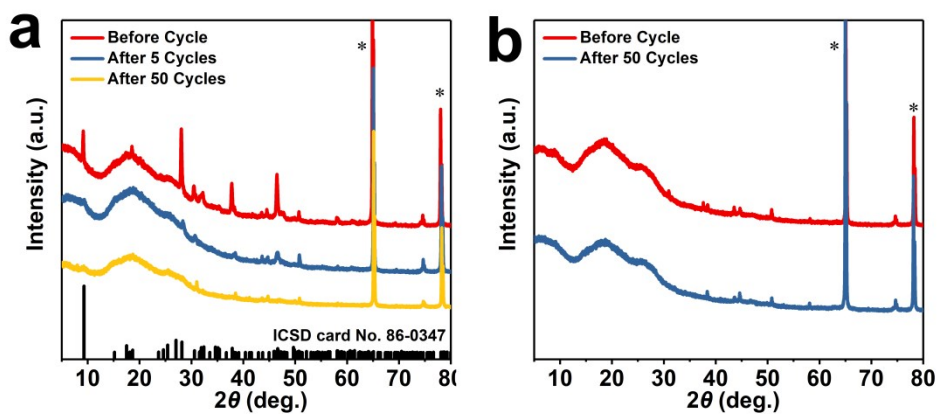

Fig. S9. *Ex-situ* XRD results of (a) the KVO electrode and (b) the KVO-H electrode before and after 50 cycles. The baselines of all XRD results are fixed corresponding to the diffraction signals of the Al current collector at  $2\theta$  of 65.1° and 78.2°, which are marked with asterisk.

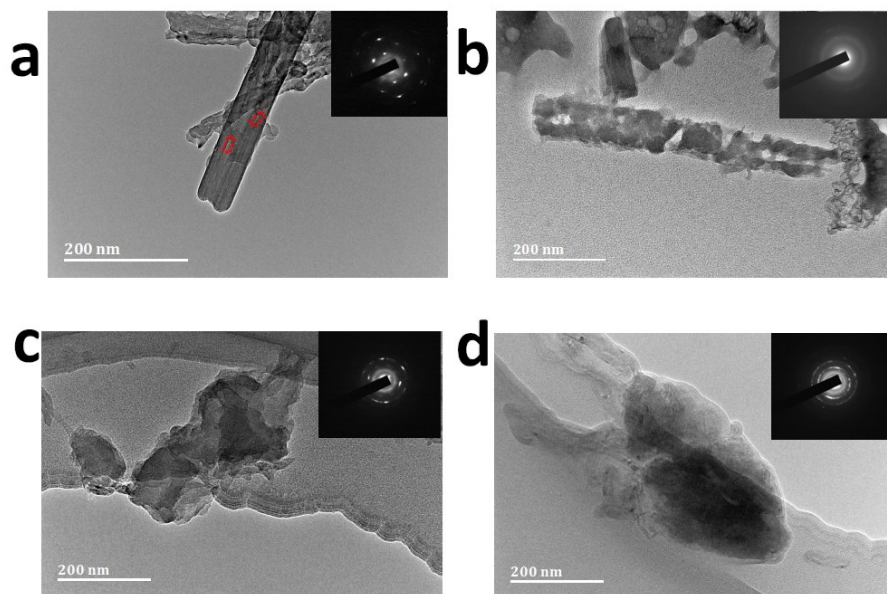

Fig. S10. *Ex-situ* TEM characterization of a, b) KVO and c, d) KVO-H after 1 cycle and 10 cycles, respectively. The insets are the corresponding SAED patterns. The fractures in Fig. S10a are marked by the red dashed squares.

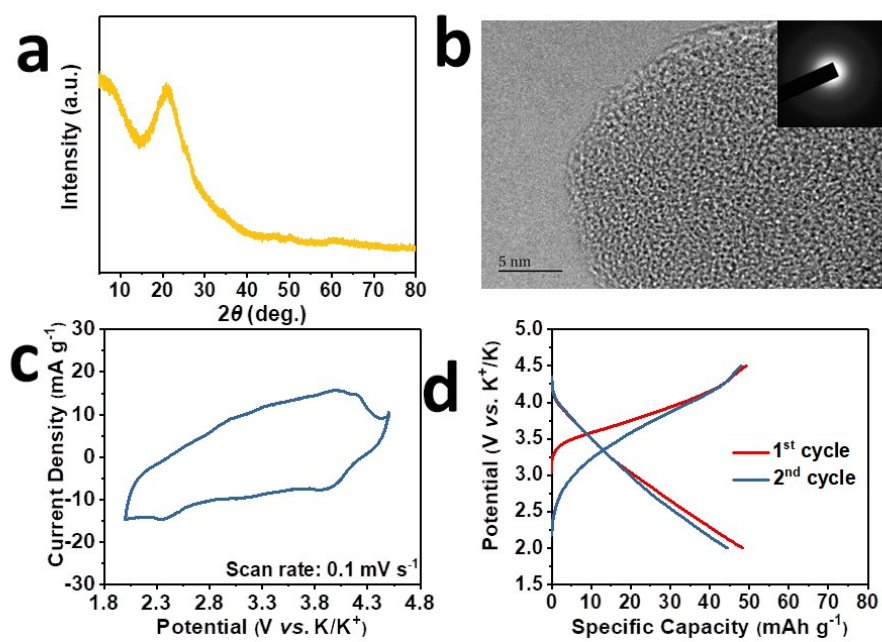

Fig. S11. Characterization of the amorphous  $K_{0.5}V_2O_5$ . a) XRD pattern, b) HRTEM image and the corresponding SAED image, c) CV profile performed at  $0.1\ mV\ s^{-1}$ , d) charge-discharge curves at the specific current of  $20\ mA\ g^{-1}$ .

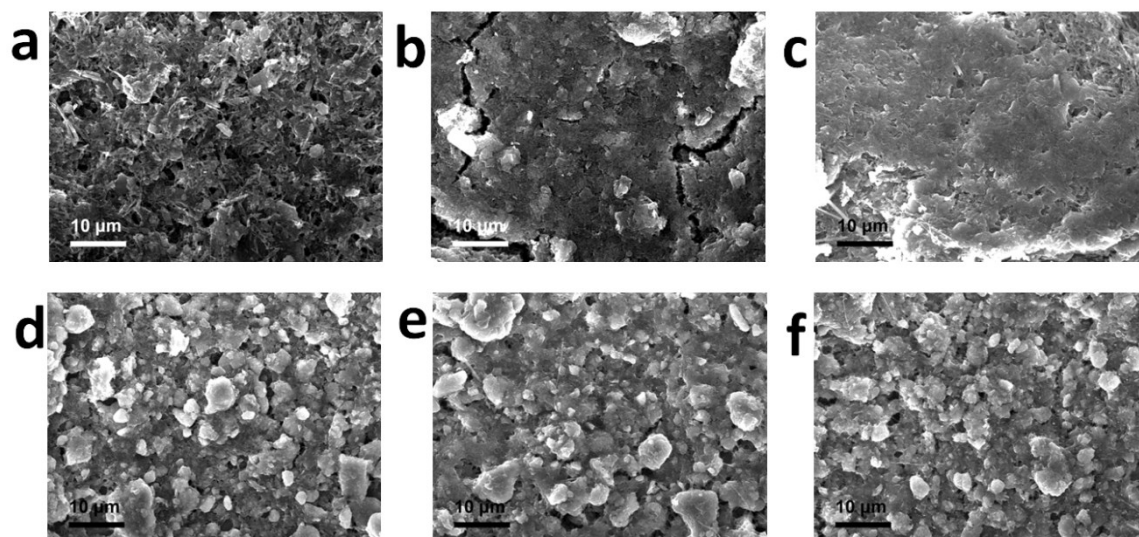

Fig. S12. *Ex-situ* SEM characterization of the KVO electrode: a) before charge-discharge, b) after 1 charge-discharge cycle, and c) after 50 charge-discharge cycles, respectively; *Ex-situ* SEM characterization of the KVO-H electrode: c) before charge-discharge, d) after 1 charge-discharge cycle, and e) after 50 charge-discharge cycles, respectively.

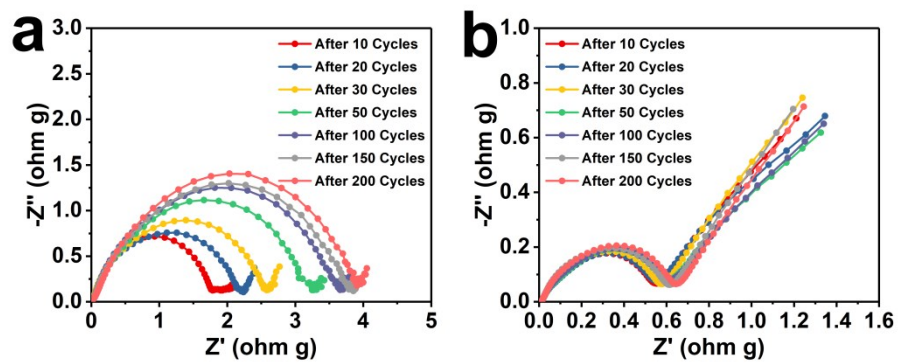

Fig. S13. Nyquist plots of a) the KVO and b) KVO-H electrodes after cycling. All EIS tests were performed at the fully charged state (4.5 V vs.  $K^+/K$ ).

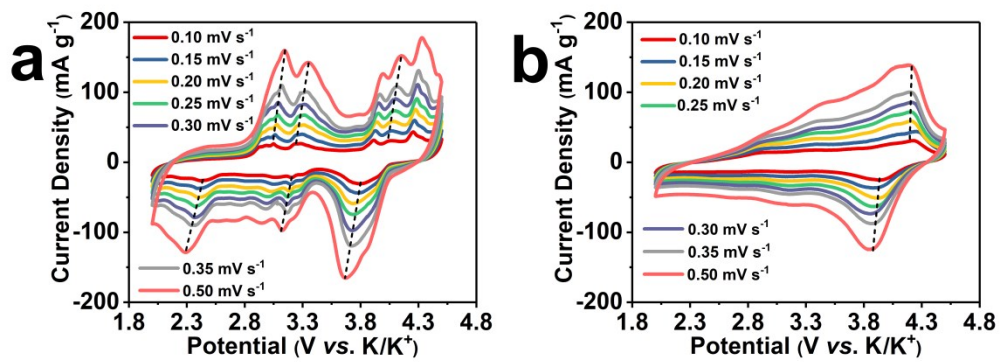

Fig. S14. CV profiles of a) the KVO and b) KVO-H electrodes at different scan rates. The dashed lines in the plots are used as a guide for eyes to show the variations of the current peaks with scan rates.

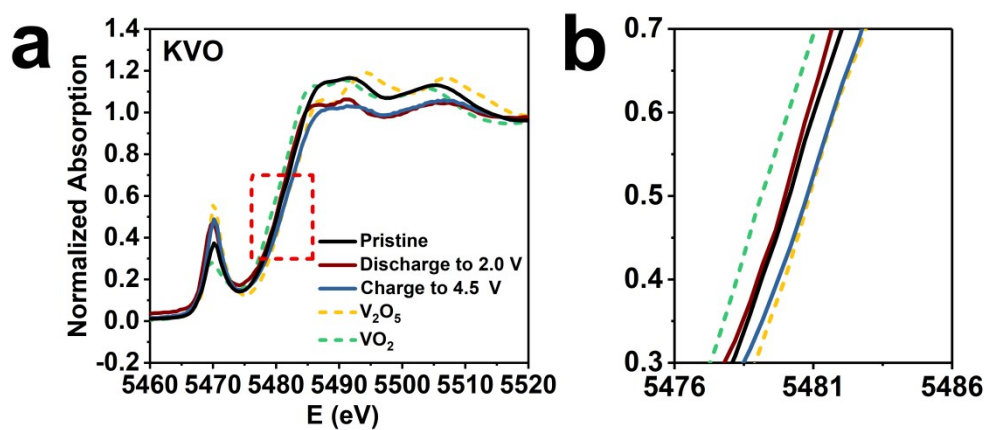

Fig. S15. a) V K-edge XANES spectra for KVO at the fully charged and discharged states. b) The enlarged areas marked by the red dashed square in (a).



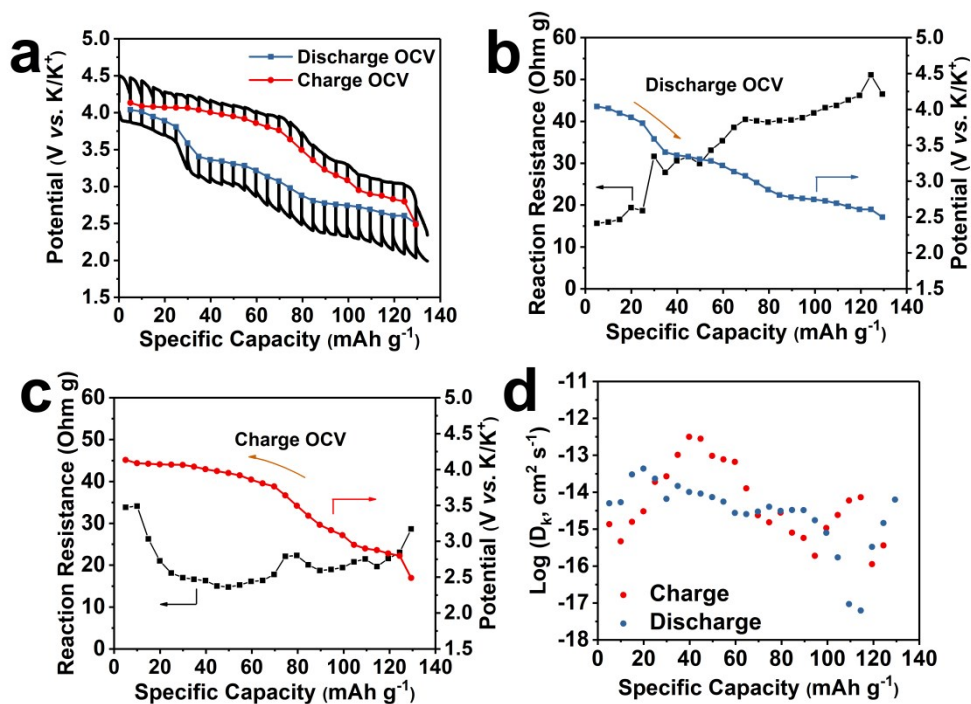

Fig. S16. a) Quasi-equilibrium potential and transient potential profiles vs. specific capacity for K-ions intercalation/deintercalation in the KVO obtained from GITT. b) Reaction resistance for K-ions intercalation into the KVO. c) Reaction resistance for K-ion deintercalation from the KVO. d) The calculated apparent chemical diffusion coefficient of potassium ( $D_K$ ) in the KVO vs. specific capacity.

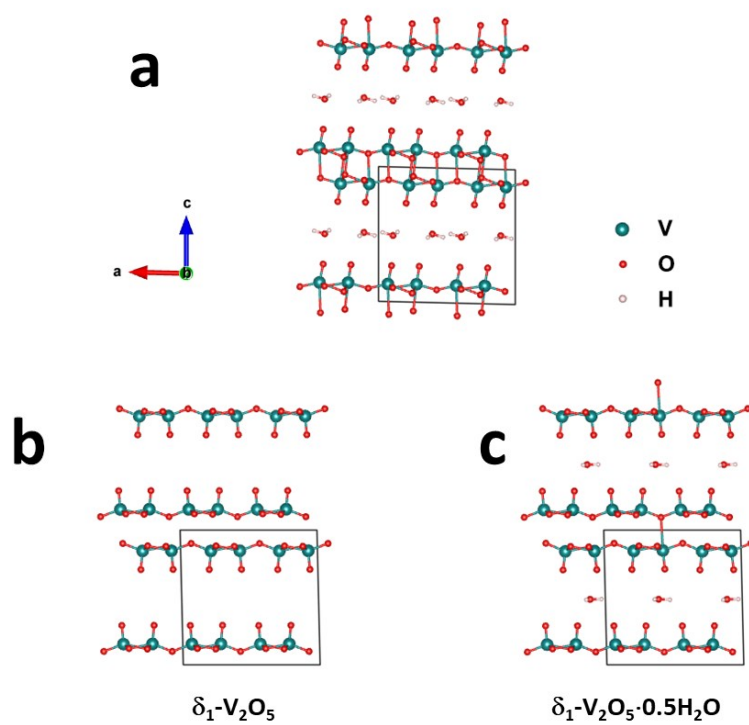

Fig. S17. Structures of a)  $\delta\text{-V}_2\text{O}_5\cdot\text{H}_2\text{O}$ , b)  $\delta_1\text{-V}_2\text{O}_5$ , and c)  $\delta_1\text{-V}_2\text{O}_5\cdot 0.5\text{H}_2\text{O}$ .

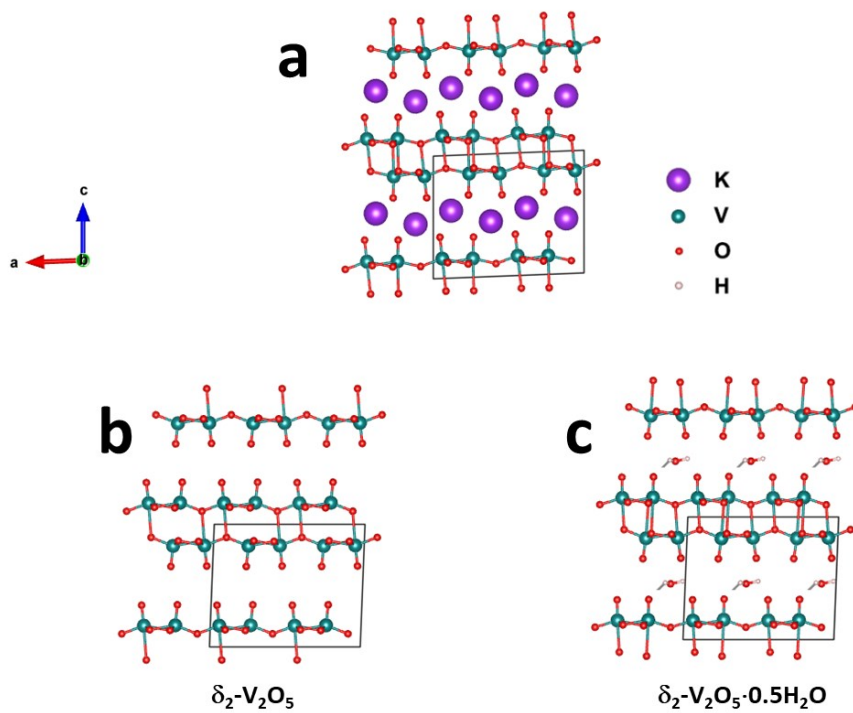

Fig. S18. Structures of a)  $\delta\text{-K}_{0.5}\text{V}_2\text{O}_5$ , b)  $\delta_2\text{-V}_2\text{O}_5$ , and c)  $\delta_2\text{-V}_2\text{O}_5 \cdot 0.5\text{H}_2\text{O}$ .

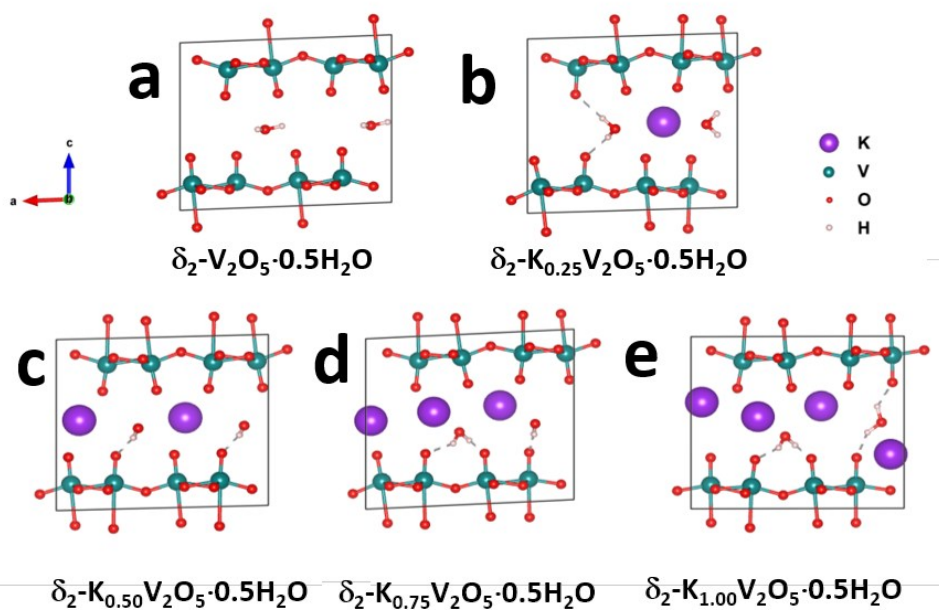

Fig. S19. Structures of a)  $\delta_2$ - $V_2O_5 \cdot 0.5H_2O$ , b)  $\delta_2$ - $K_{0.25}V_2O_5 \cdot 0.5H_2O$ , c)  $\delta_2$ - $K_{0.50}V_2O_5 \cdot 0.5H_2O$ , d)  $\delta_2$ - $K_{0.75}V_2O_5 \cdot 0.5H_2O$ , and e)  $\delta_2$ - $K_{1.00}V_2O_5 \cdot 0.5H_2O$ .

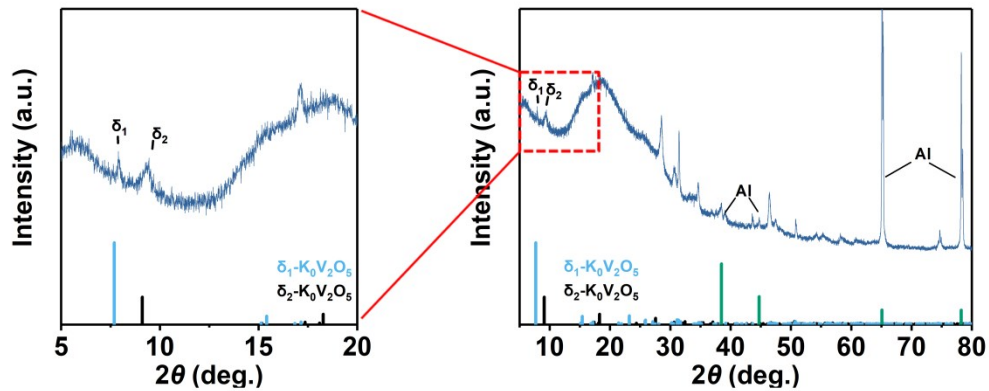

Fig. S20. Comparison of the XRD result of the KVO electrode at the fully charged state after the first charge process with the expected diffraction response of  $\delta_1$ - $V_2O_5$  and  $\delta_2$ - $V_2O_5$  obtained from the DFT calculations. The diffraction signals of Al current collector are also marked in the plot.

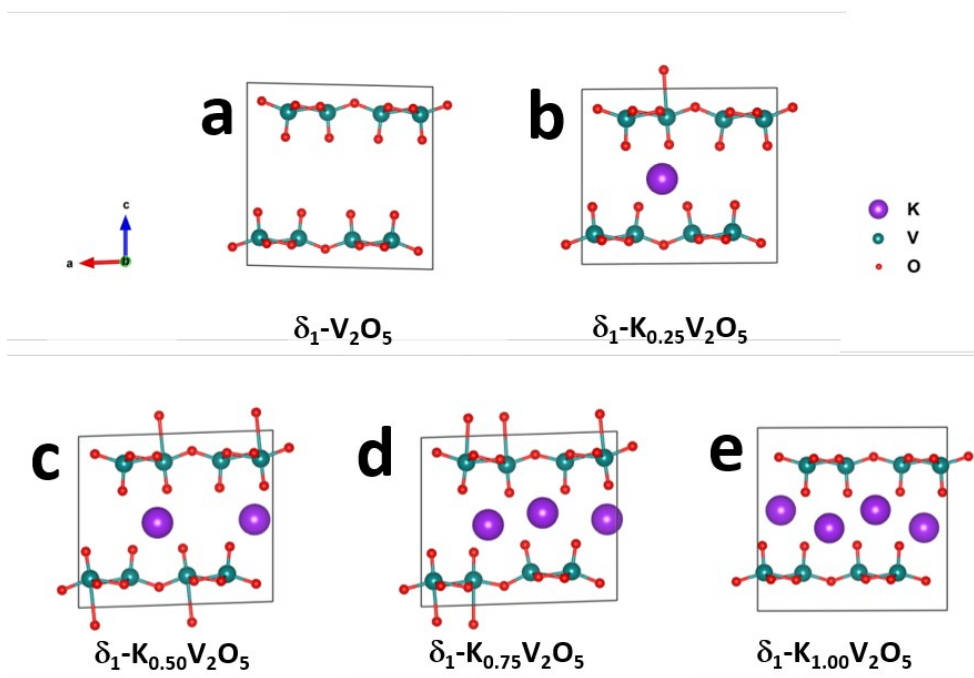

Fig. S21. Structures of a)  $\delta_1$ - $V_2O_5$ , b)  $\delta_1$ - $K_{0.25}V_2O_5$ , c)  $\delta_1$ - $K_{0.50}V_2O_5$ , d)  $\delta_1$ - $K_{0.75}V_2O_5$ , and e)  $\delta_1$ - $K_{1.00}V_2O_5$ .

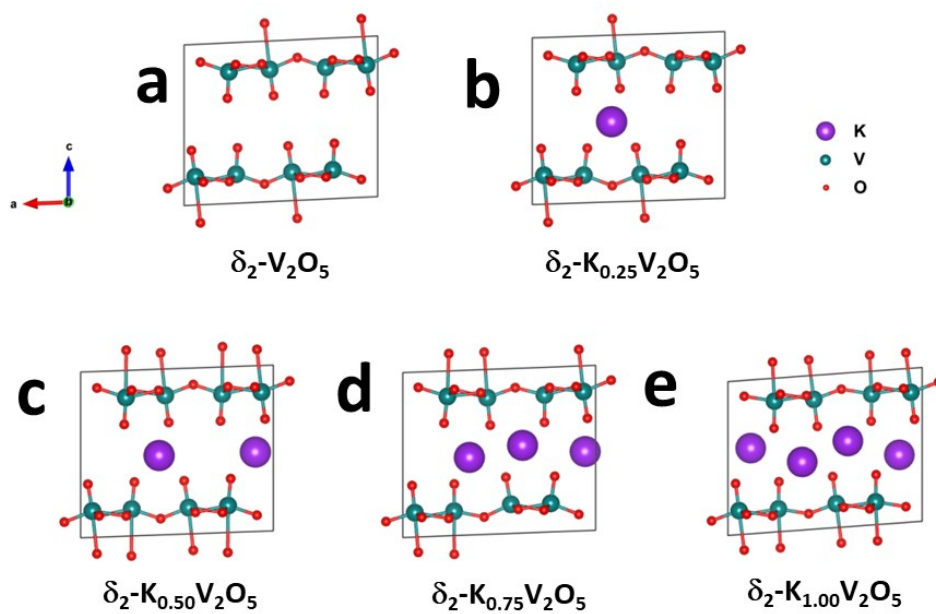

Fig. S22. Structures of a)  $\delta_2$ - $V_2O_5$ , b)  $\delta_2$ - $K_{0.25}V_2O_5$ , c)  $\delta_2$ - $K_{0.50}V_2O_5$ , d)  $\delta_2$ - $K_{0.75}V_2O_5$ , and e)  $\delta_2$ - $K_{1.00}V_2O_5$ .

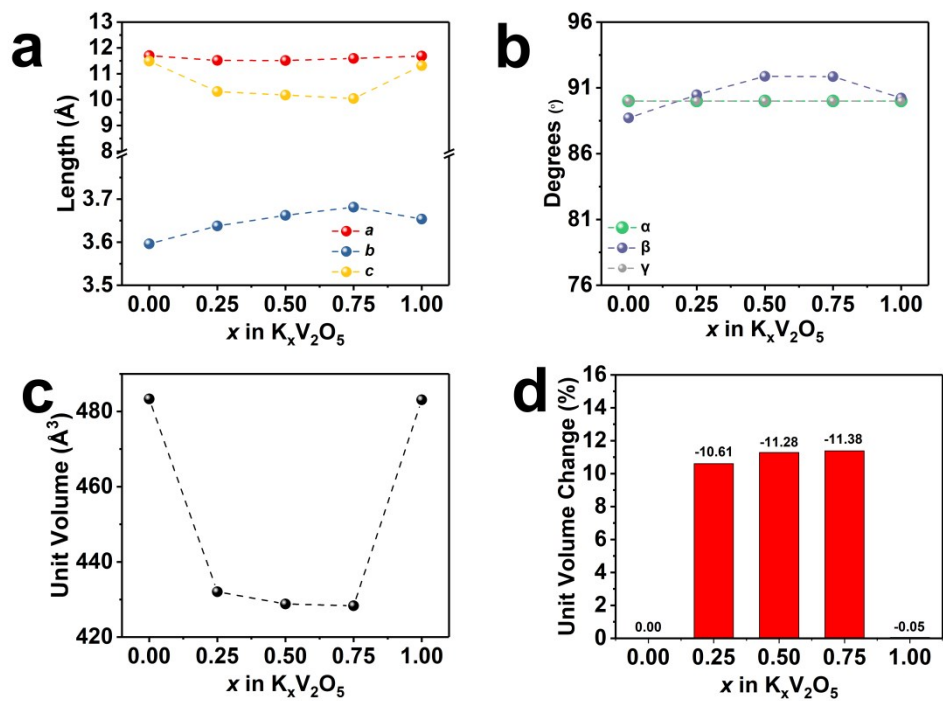

Fig. S23. The calculated (a and b) lattice parameters and (c) unit cell volumes of  $\delta_1\text{-K}_x\text{V}_2\text{O}_5$  ( $0 \leq x \leq 1$ ) at various K-ion contents. (d) The difference of the unit cell volume between  $\delta_1\text{-K}_x\text{V}_2\text{O}_5$  ( $0 \leq x \leq 1$ ) and  $\delta_1\text{-V}_2\text{O}_5$ .



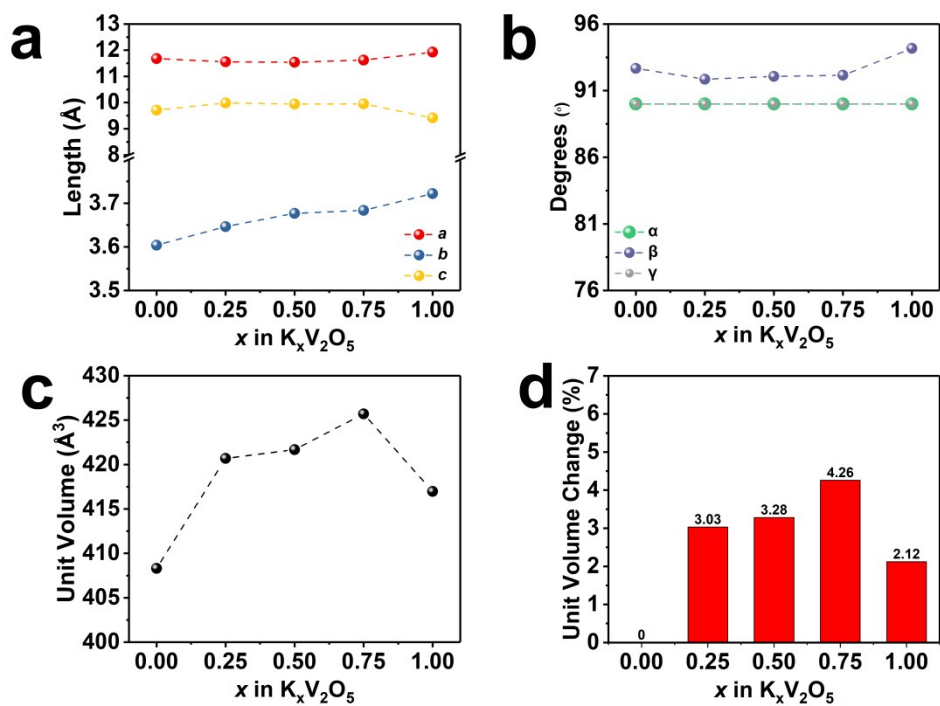

Fig. S24. The calculated (a and b) lattice parameters and (c) unit cell volumes of  $\delta_2\text{-K}_x\text{V}_2\text{O}_5$  ( $0 \leq x \leq 1$ ) at various K-ion contents. (d) The difference of the unit cell volume between  $\delta_2\text{-K}_x\text{V}_2\text{O}_5$  ( $0 \leq x \leq 1$ ) and  $\delta_2\text{-V}_2\text{O}_5$ .

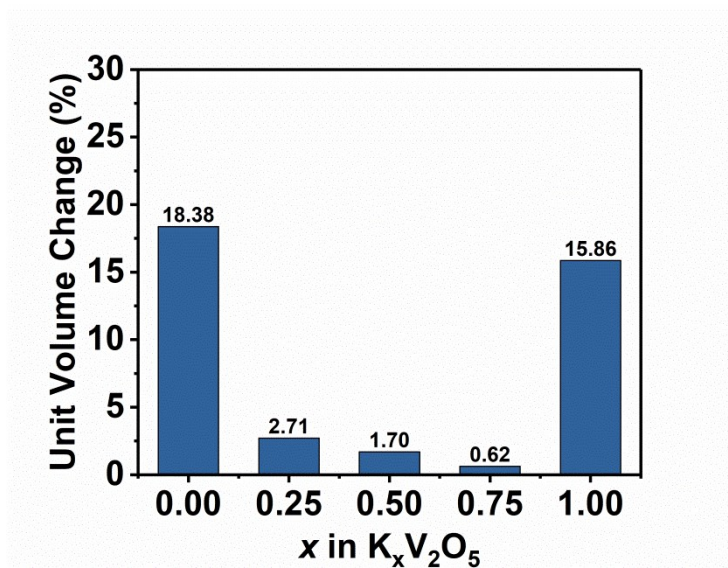

Fig. S25. The unit cell volume difference between  $\delta_1$ - $K_xV_2O_5$  and  $\delta_2$ - $K_xV_2O_5$  ( $0 \leq x \leq 1$ ) in comparison with the unit cell volume of  $\delta_2$ - $K_xV_2O_5$  ( $0 \leq x \leq 1$ ).
